# Supplementary material for: Cannabidiol Exposure During the Mouse Adolescent Period Is Without Harmful Behavioral Effects on Locomotor Activity, Anxiety, and Spatial Memory
Source: PubMed Central journal article supplement (PMC8426900; doi:10.3389/fnbeh.2021.711639), 2021-08-26
Supplement: Image_1.pdf [file Image_1.pdf]

Supplemental Figure 1

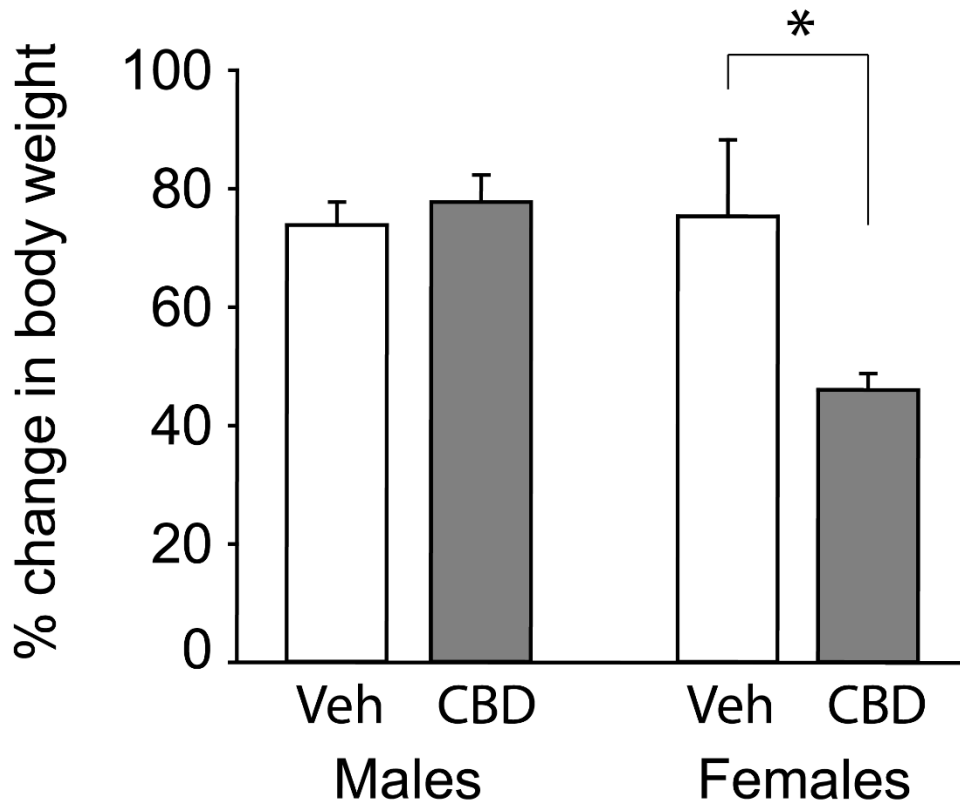

**Female CBD-treated mice gained less weight during the 3-week treatment period.** Summary bar chart showing the percent change in body weight from day 1 to day 21 of the treatment period in male and female mice treated with vehicle (white) or CBD (gray). Male mice treated with vehicle and CBD showed a similar percent increase in body weight (vehicle:  $73.91 \pm 3.87\%$ ; CBD:  $77.81 \pm 4.58\%$ ), whereas females treated vehicle gained a higher percent of their body weight than CBD treated mice (vehicle:  $75.41 \pm 12.91\%$ ; CBD:  $46.14 \pm 2.73\%$ ). \* indicates  $P < .05$  by Tukey's HSD post hoc comparisons.
