# Supplementary material for: Cannabidiol Exposure During the Mouse Adolescent Period Is Without Harmful Behavioral Effects on Locomotor Activity, Anxiety, and Spatial Memory
Source: PubMed Central journal article supplement (PMC8426900; doi:10.3389/fnbeh.2021.711639), 2021-08-26
Supplement: Image_2.pdf [file Image_2.pdf]

## Supplemental Figure 2

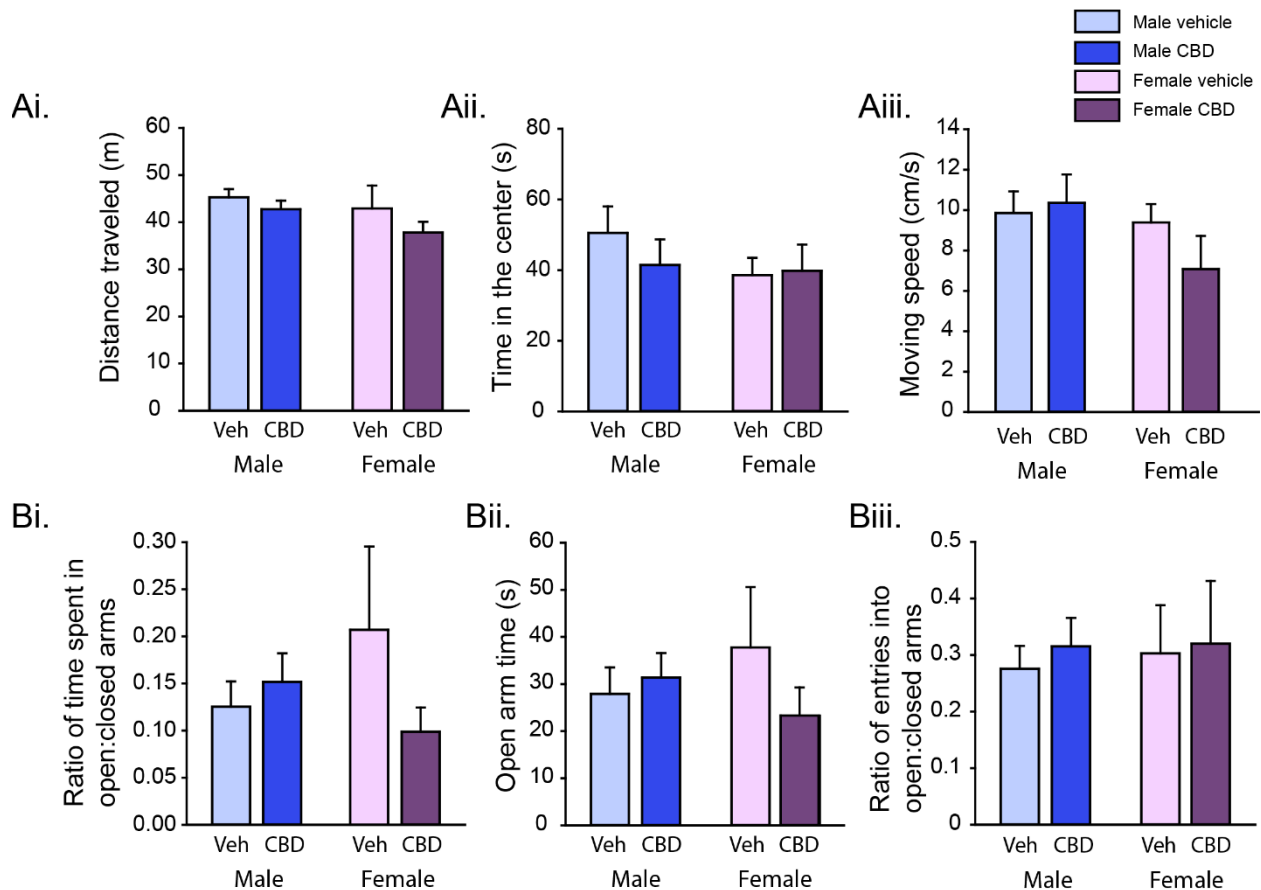

**No sex differences in CBD's impact on locomotor activity in the open field or anxiety-like behavior in the EPM.** For all figures, vehicle-treated males are depicted in light blue, CBD-treated males in dark blue, vehicle-treated females in light pink and CBD-treated females in dark purple. **A.** Summary bar charts of data collected in the open field indicating that there were no differences in distance traveled (Ai; males: vehicle:  $45.30 \pm 1.72$  m; CBD:  $42.72 \pm 1.84$  m; females: vehicle:  $43.00 \pm 4.82$  m; CBD:  $37.82 \pm 2.26$  m), time in the center quadrant (Aii; males: vehicle:  $50.51 \pm 7.49$  s; CBD:  $41.45 \pm 7.25$  s; females: vehicle:  $38.54 \pm 4.91$  s; CBD:  $39.79 \pm 7.44$  s), nor mean moving speed (Aiii; males: vehicle:  $9.86 \pm 1.07$  cm/s; CBD:  $9.40 \pm 0.91$  cm/s; females: vehicle:  $10.36 \pm 1.41$  cm/s; CBD:  $7.08 \pm 1.64$  cm/s). **B.** Summary bar charts of data collected in the EPM indicating that there were no differences in ratio of time spent in the open:closed arms (Bi; males: vehicle:  $0.13 \pm 0.03$ ; CBD:  $0.15 \pm 0.03$ ; females: vehicle:  $0.21 \pm 0.09$ ; CBD:  $0.10 \pm 0.03$ ), time spent in the open arms (Bii; males: vehicle:  $27.93 \pm 5.59$  s; CBD:  $31.35 \pm 5.22$  s; females: vehicle:  $37.77 \pm 12.83$  s; CBD:  $23.28 \pm 6.00$  s), nor ratio of entries into the open:closed arms (Biii; males: vehicle:  $0.28 \pm 0.04$ ; CBD:  $0.32 \pm 0.05$ ; females: vehicle:  $0.30 \pm 0.08$ ; CBD:  $0.32 \pm 0.11$ ). Data are represented as mean  $\pm$  SEM.
